# Supplementary material for: Novel derivatives of eugenol as potent anti-inflammatory agents via PPARγ agonism: rational design, synthesis, analysis, PPARγ protein binding assay and computational studies
Source: Royal Society of Chemistry journal article supplement (doi:10.1039/d2ra02116a), 2022-01-01
Supplement: d2ra02116a1.pdf [file d2ra02116a1.pdf]

# **Novel derivatives of eugenol as potent anti-inflammatory agents via PPAR $\gamma$ agonism: Rational design, synthesis, analysis, PPAR $\gamma$ protein binding assay, and computational studies**

Noor Fathima Anjum<sup>a</sup>, Dhivya Shanmugarajan<sup>b</sup>, Vasanth Kumar Shivaraju,<sup>c</sup> Syed Faizan<sup>b</sup>,  
Namburu Lalitha Naishima<sup>b</sup>, Prashantha Kumar BR<sup>b</sup>, Saleem Javid<sup>a</sup>, Madhusudan N.  
Purohit<sup>b\*</sup>

<sup>a</sup>*Department of Pharmaceutical Chemistry, Farooqia College of Pharmacy, Mysuru 570 015, India.*

<sup>b</sup>*Department of Pharmaceutical Chemistry, JSS College of Pharmacy, Mysuru 570 015, India. JSS Academy of Higher Education & Research, Mysuru 570 015, India.*

<sup>c</sup>*DOS in Chemistry, Karnataka State Open University, Mukthagangothri, Mysuru 570 006, India.*

## **Supplementary Material**

| <b>CONTENTS</b>              | <b>Page No.</b> |
|------------------------------|-----------------|
| <b>1. Spectra.....</b>       | <b>2-9</b>      |
| <b>2. TR-FRET Assay.....</b> | <b>10-11</b>    |

## Spectra of synthesized compounds

### 1. IR, $^1\text{H}$ NMR, $^{13}\text{C}$ NMR & Mass Spectra of compound 1A

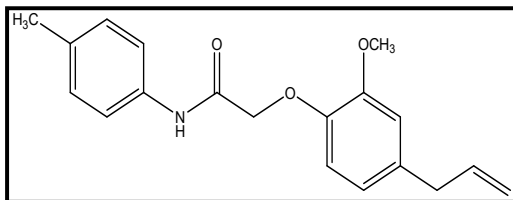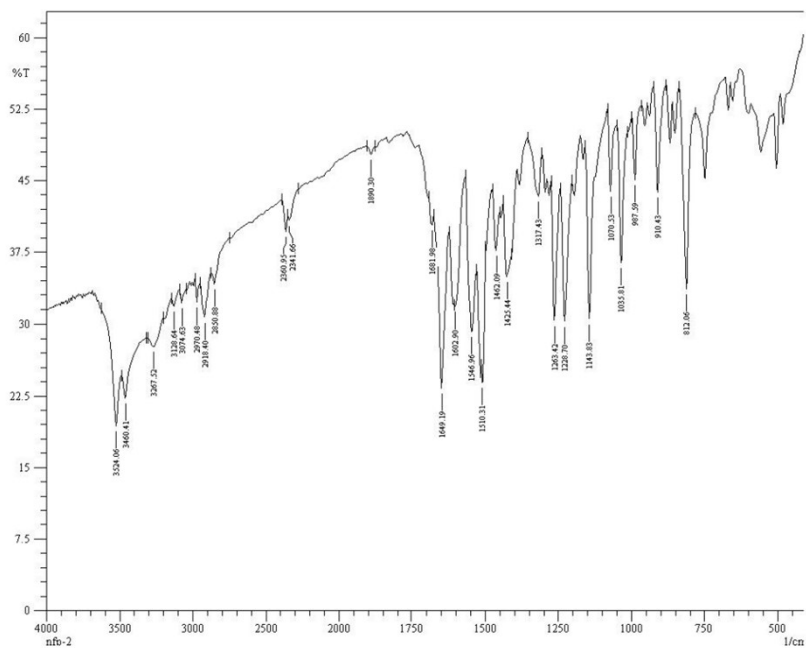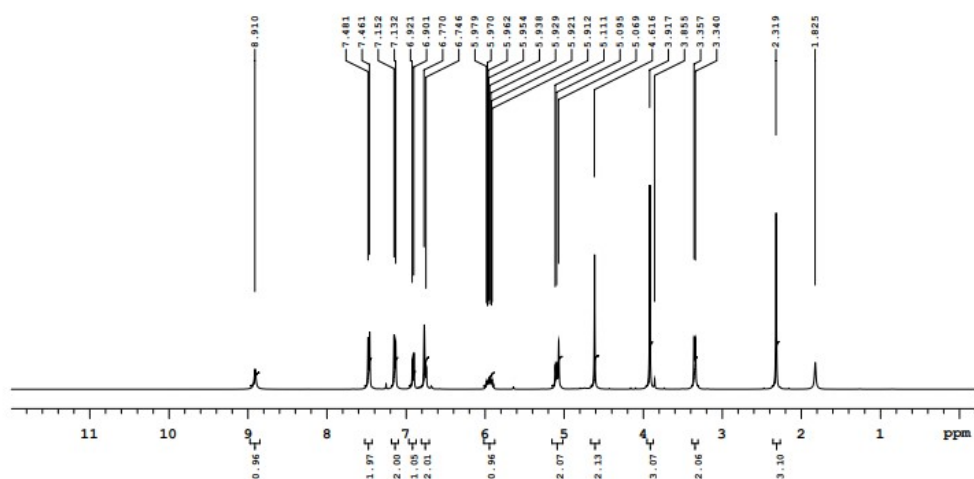

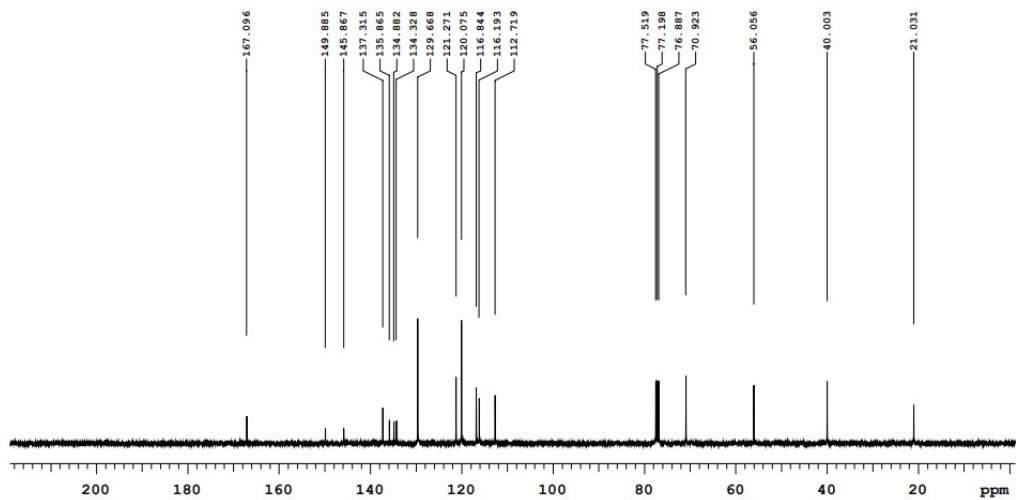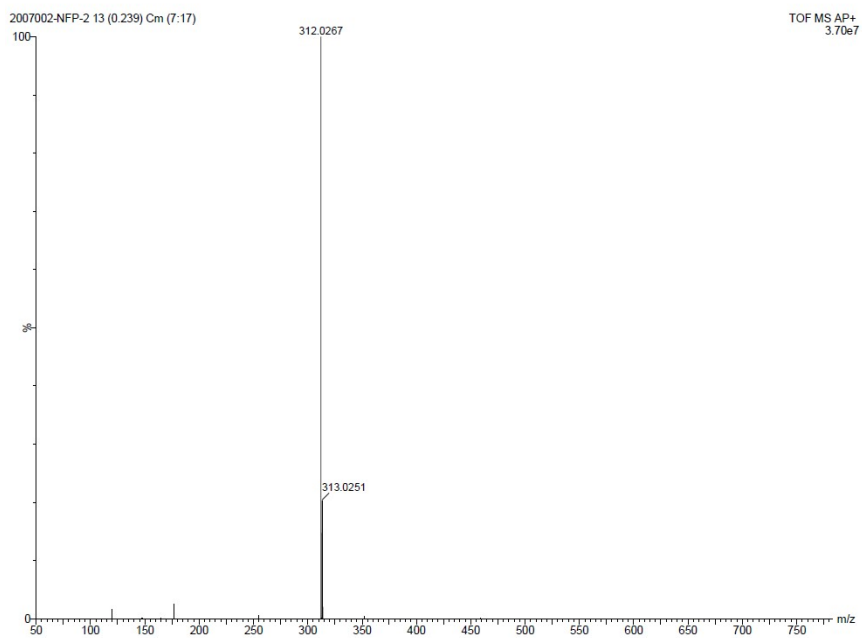

## 2. IR, <sup>1</sup>H NMR, <sup>13</sup>C NMR & Mass Spectra of compound 1B

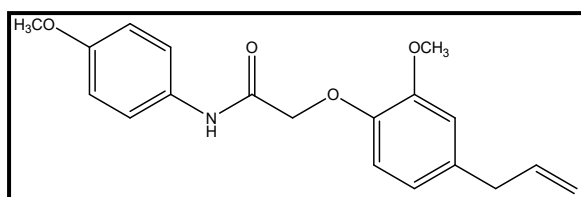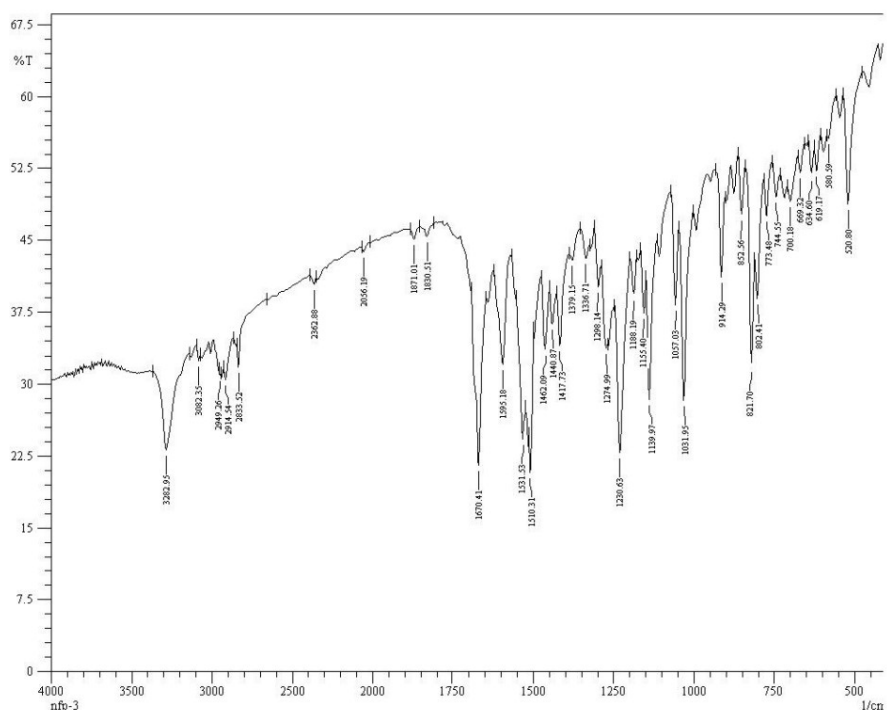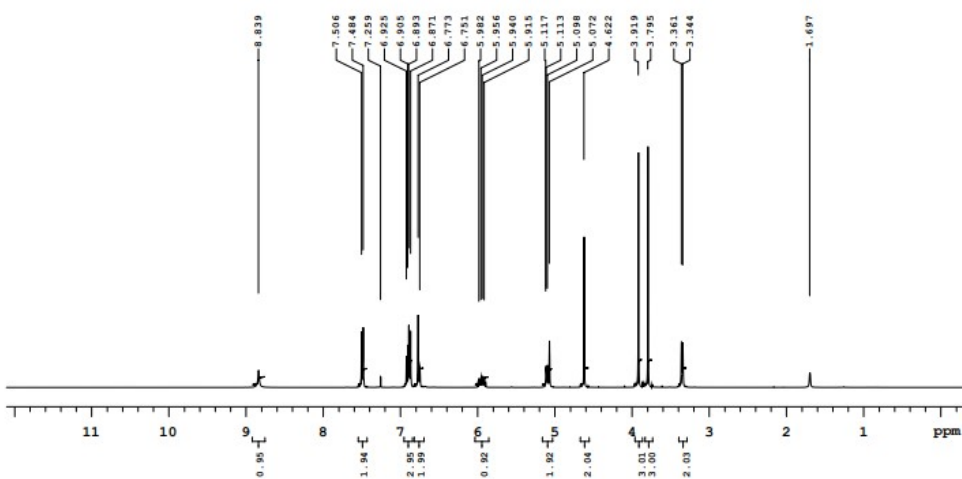

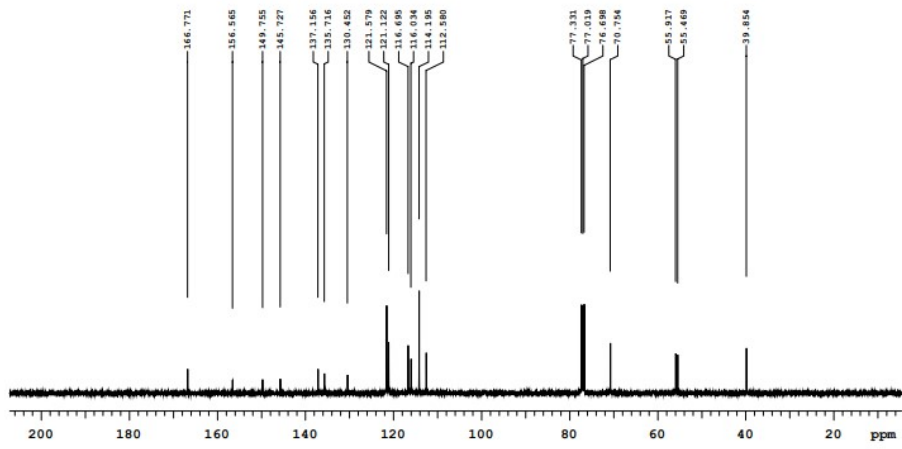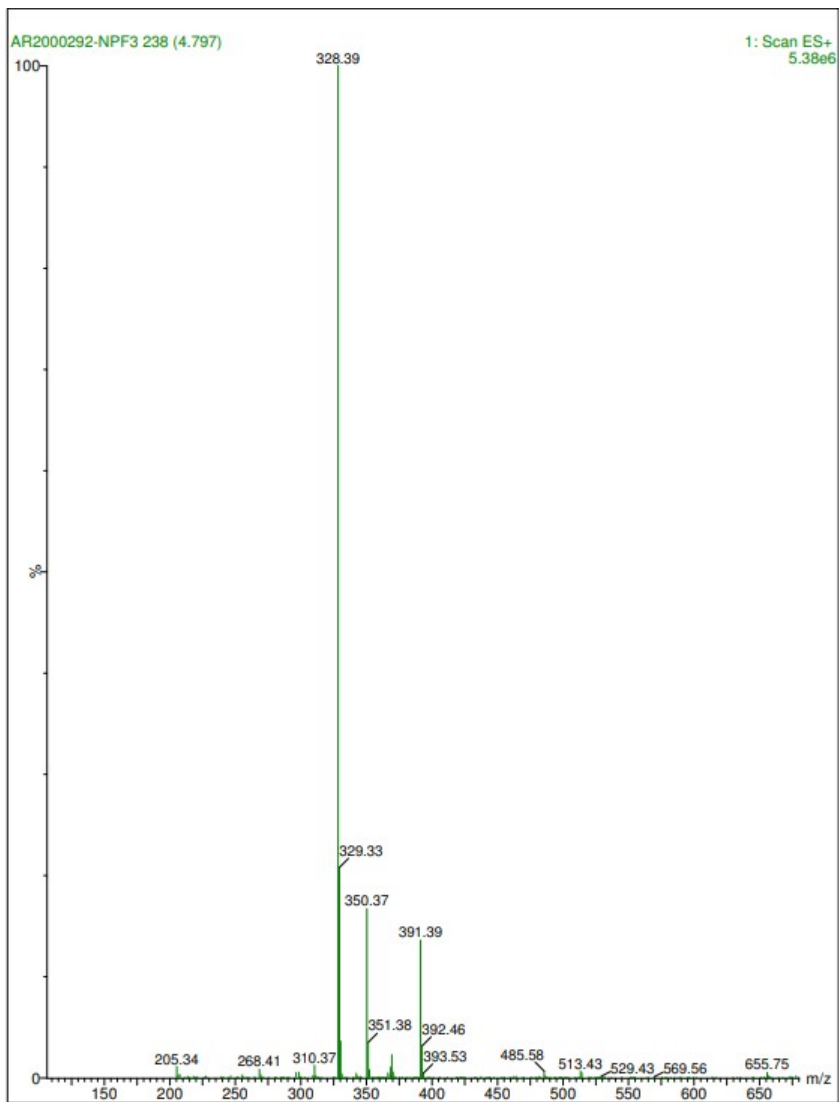

### 3. IR, $^1\text{H}$ NMR, $^{13}\text{C}$ NMR & Mass Spectra of compound 1C

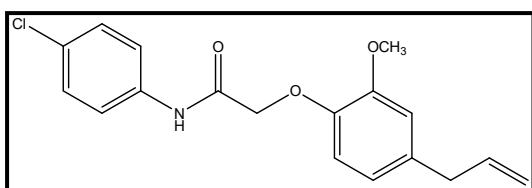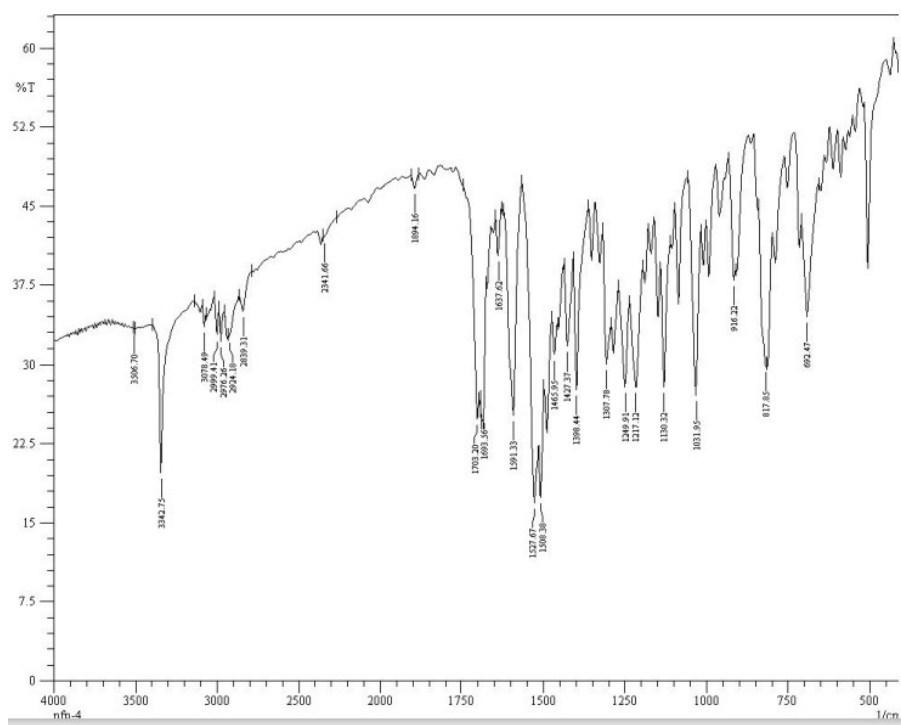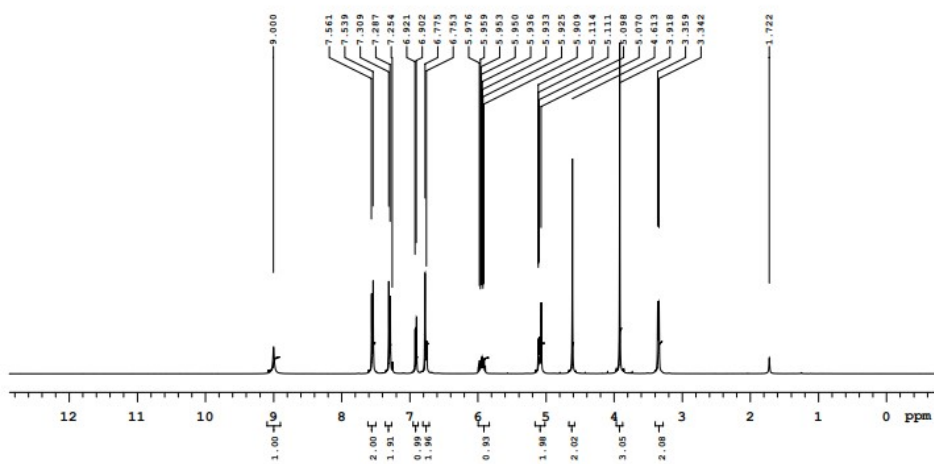

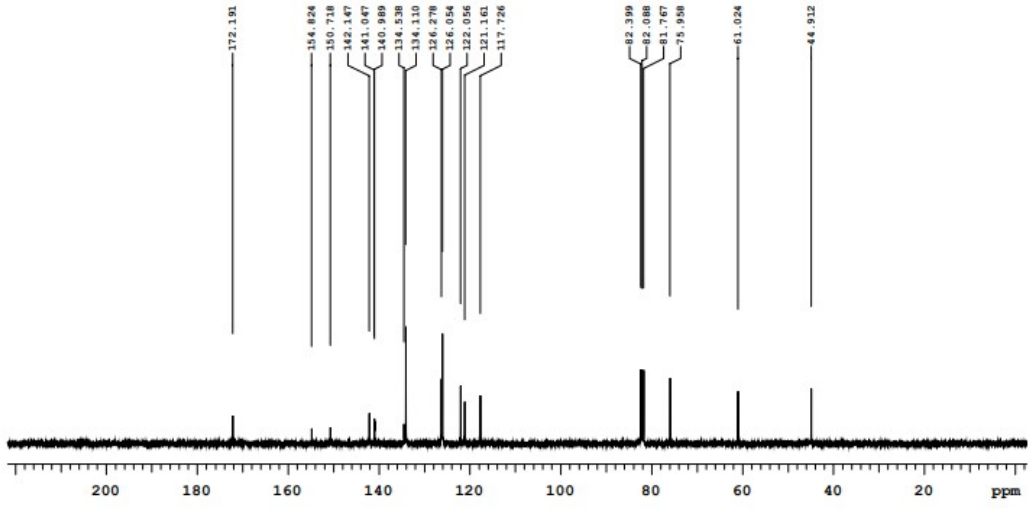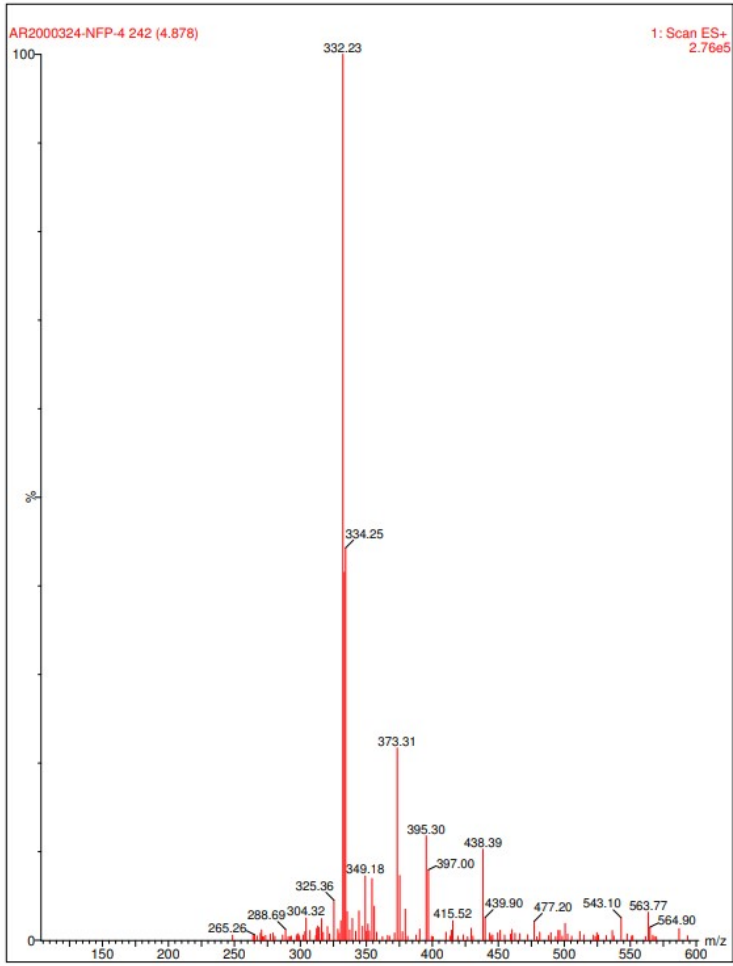

### 3. IR, $^1\text{H}$ NMR, $^{13}\text{C}$ NMR & Mass Spectra of compound 1D

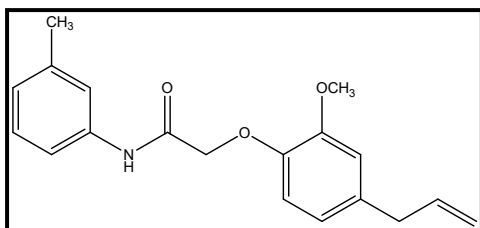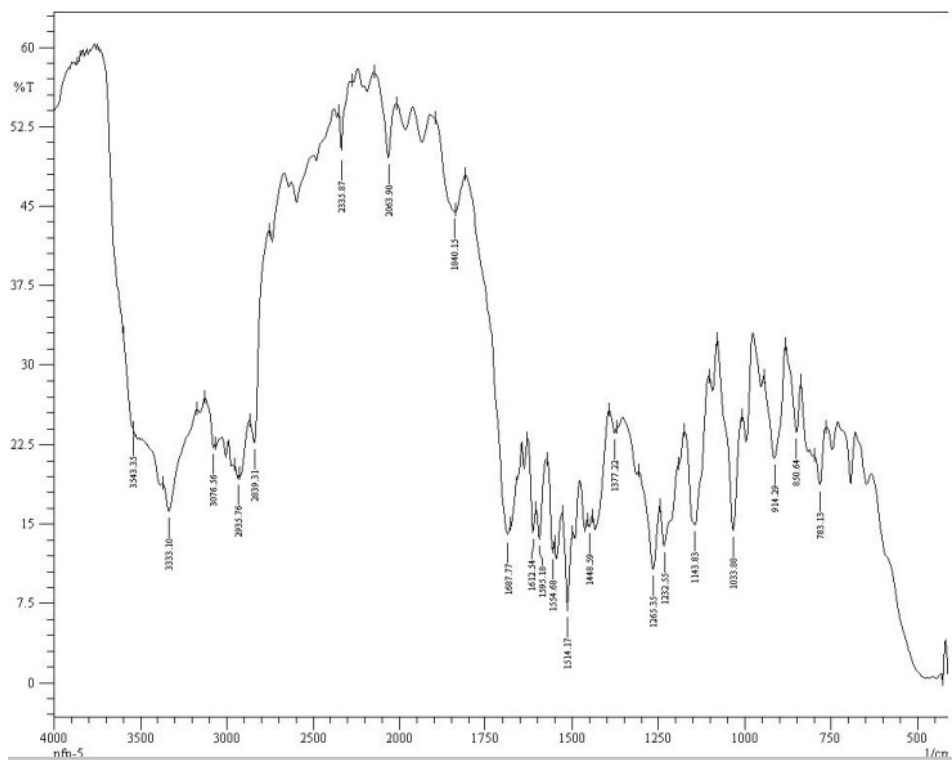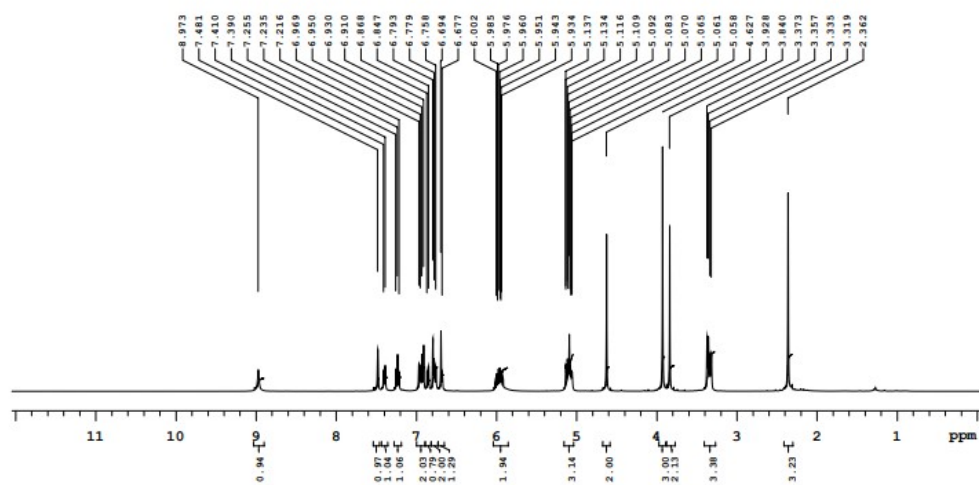



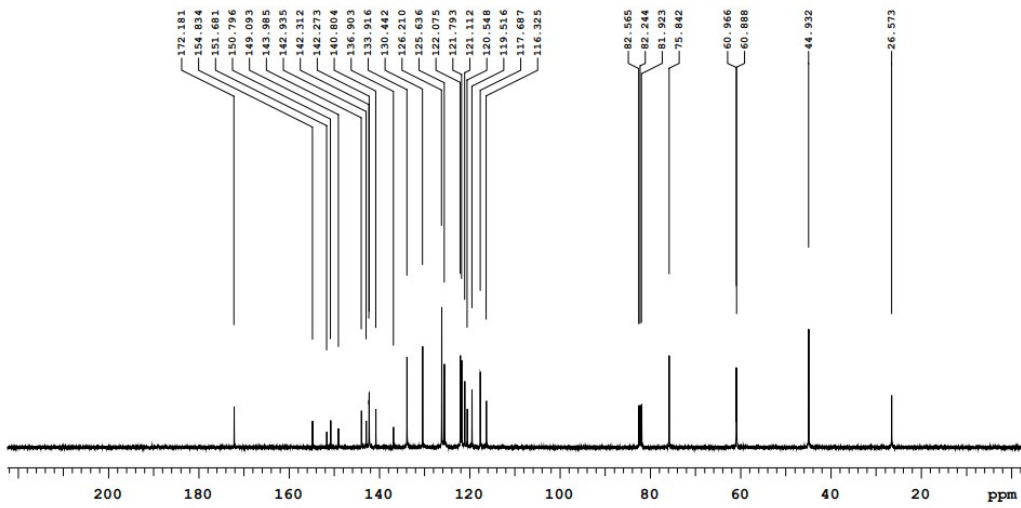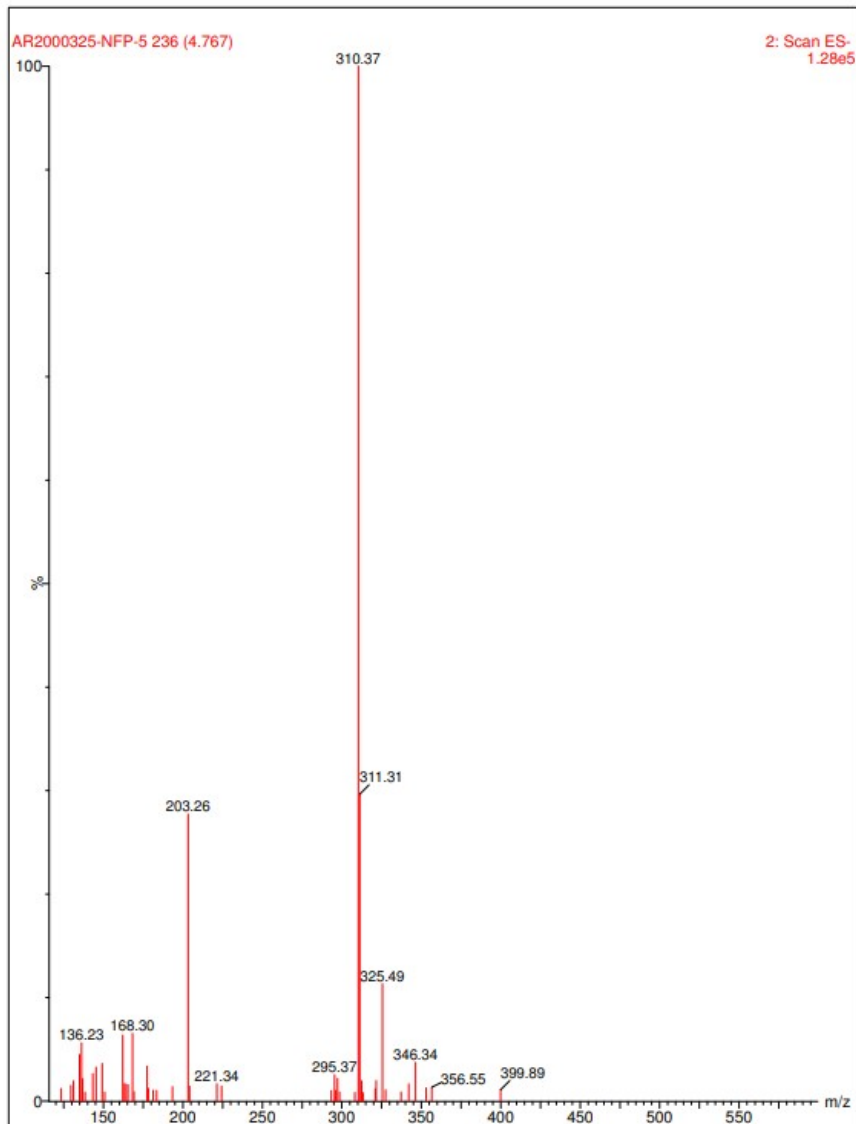

**TR-FRET Assay:****Compound 1A**

| <b>SL No.</b> | <b>1A (Concentration (μM))</b> | <b>Raw Data (RLU)</b> | <b>Raw Data - Background (RLU)</b> |
|---------------|--------------------------------|-----------------------|------------------------------------|
| 1             | 100                            | 0.54                  | 0.300619419                        |
| 2             | 20                             | 1.07                  | 0.839901744                        |
| 3             | 4                              | 1.57                  | 1.33177375                         |
| 4             | 0.8                            | 1.99                  | 1.754049283                        |
| 5             | 0.16                           | 1.95                  | 1.715545715                        |
| 6             | 0.032                          | 2.00                  | 1.760204347                        |
| 7             | 0.0064                         | 1.92                  | 1.687764768                        |
| 8             | 0.00128                        | 2.02                  | 1.787422152                        |
| 9             | 0.000256                       | 2.10                  | 1.861679618                        |
| 10            | 0.0000512                      | 2.07                  | 1.839505412                        |

**Compound 1B**

| <b>SL No.</b> | <b>1B Concentration (μM)</b> | <b>Raw Data (RLU)</b> | <b>Raw Data - Background (RLU)</b> |
|---------------|------------------------------|-----------------------|------------------------------------|
| 1             | 100                          | 0.534                 | 0.298879758                        |
| 2             | 20                           | 1.280                 | 1.04507794                         |
| 3             | 4                            | 1.855                 | 1.619466248                        |
| 4             | 0.8                          | 2.002                 | 1.767370589                        |
| 5             | 0.16                         | 1.960                 | 1.724473418                        |
| 6             | 0.032                        | 1.913                 | 1.678017542                        |
| 7             | 0.0064                       | 1.913                 | 1.678286208                        |
| 8             | 0.00128                      | 1.965                 | 1.73005786                         |
| 9             | 0.000256                     | 1.990                 | 1.754676693                        |
| 10            | 0.0000512                    | 2.024                 | 1.788731767                        |

**Compound 1C**

| <b>SL No.</b> | <b>1C Concentration (<math>\mu\text{M}</math>)</b> | <b>Raw Data (RLU)</b> | <b>Raw Data - Background (RLU)</b> |
|---------------|----------------------------------------------------|-----------------------|------------------------------------|
| 1             | 100                                                | 0.951                 | 0.716                              |
| 2             | 20                                                 | 1.058                 | 0.823                              |
| 3             | 4                                                  | 1.761                 | 1.526                              |
| 4             | 0.8                                                | 1.922                 | 1.687                              |
| 5             | 0.16                                               | 1.921                 | 1.686                              |
| 6             | 0.032                                              | 1.989                 | 1.754                              |
| 7             | 0.0064                                             | 1.934                 | 1.699                              |
| 8             | 0.00128                                            | 1.907                 | 1.672                              |
| 9             | 0.000256                                           | 1.896                 | 1.660                              |
| 10            | 0.0000512                                          | 2.069                 | 1.834                              |

**Compoundd 1D**

| <b>SL No.</b> | <b>1D (Concentration (<math>\mu\text{M}</math>))</b> | <b>Raw Data (RLU)</b> | <b>Raw Data - Background (RLU)</b> |
|---------------|------------------------------------------------------|-----------------------|------------------------------------|
| 1             | 100                                                  | 1.40                  | 1.17                               |
| 2             | 20                                                   | 1.91                  | 1.67                               |
| 3             | 4                                                    | 1.91                  | 1.67                               |
| 4             | 0.8                                                  | 1.91                  | 1.68                               |
| 5             | 0.16                                                 | 1.87                  | 1.64                               |
| 6             | 0.032                                                | 1.93                  | 1.70                               |
| 7             | 0.0064                                               | 2.07                  | 1.83                               |
| 8             | 0.00128                                              | 1.85                  | 1.61                               |
| 9             | 0.000256                                             | 1.95                  | 1.72                               |
| 10            | 0.0000512                                            | 1.92                  | 1.69                               |
